# Supplementary material for: Darkness-induced effects on gene expression in Cosmarium crenatum (Zygnematophyceae) from a polar habitat
Source: PubMed Central journal article supplement (PMC6646379; doi:10.1038/s41598-019-47041-7), 2019-07-22
Supplement: 41598_2019_47041_MOESM1_ESM.pdf [file 41598_2019_47041_MOESM1_ESM.pdf]

Supplementary Figures and legends

**Darkness-induced effects on gene  
expression in *Cosmarium crenatum*  
(Zygnematophyceae) from  
a polar habitat**

Florian Mundt, Dieter Hanelt, Lars Harms, Sandra Heinrich

Supplementary Figure 1.

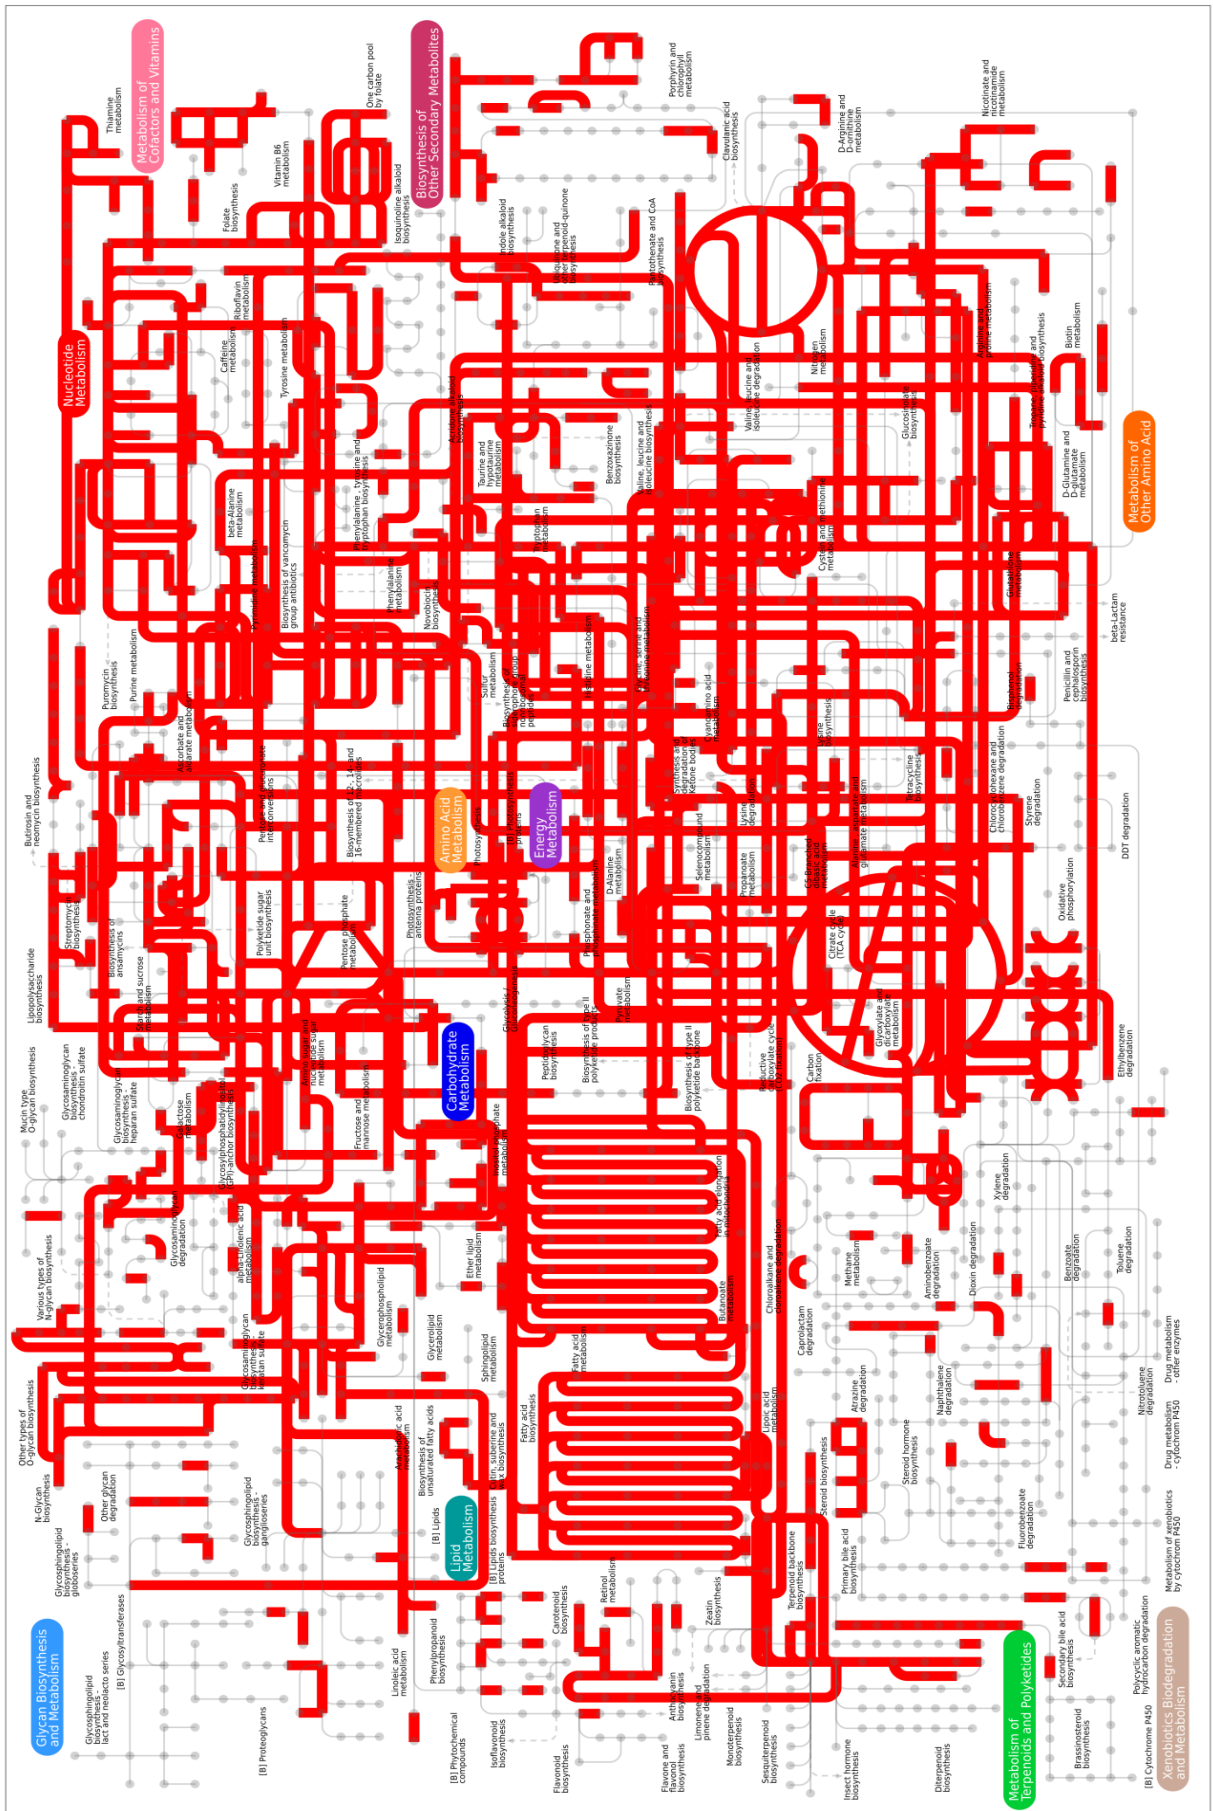

**Supplementary Figure 2.**

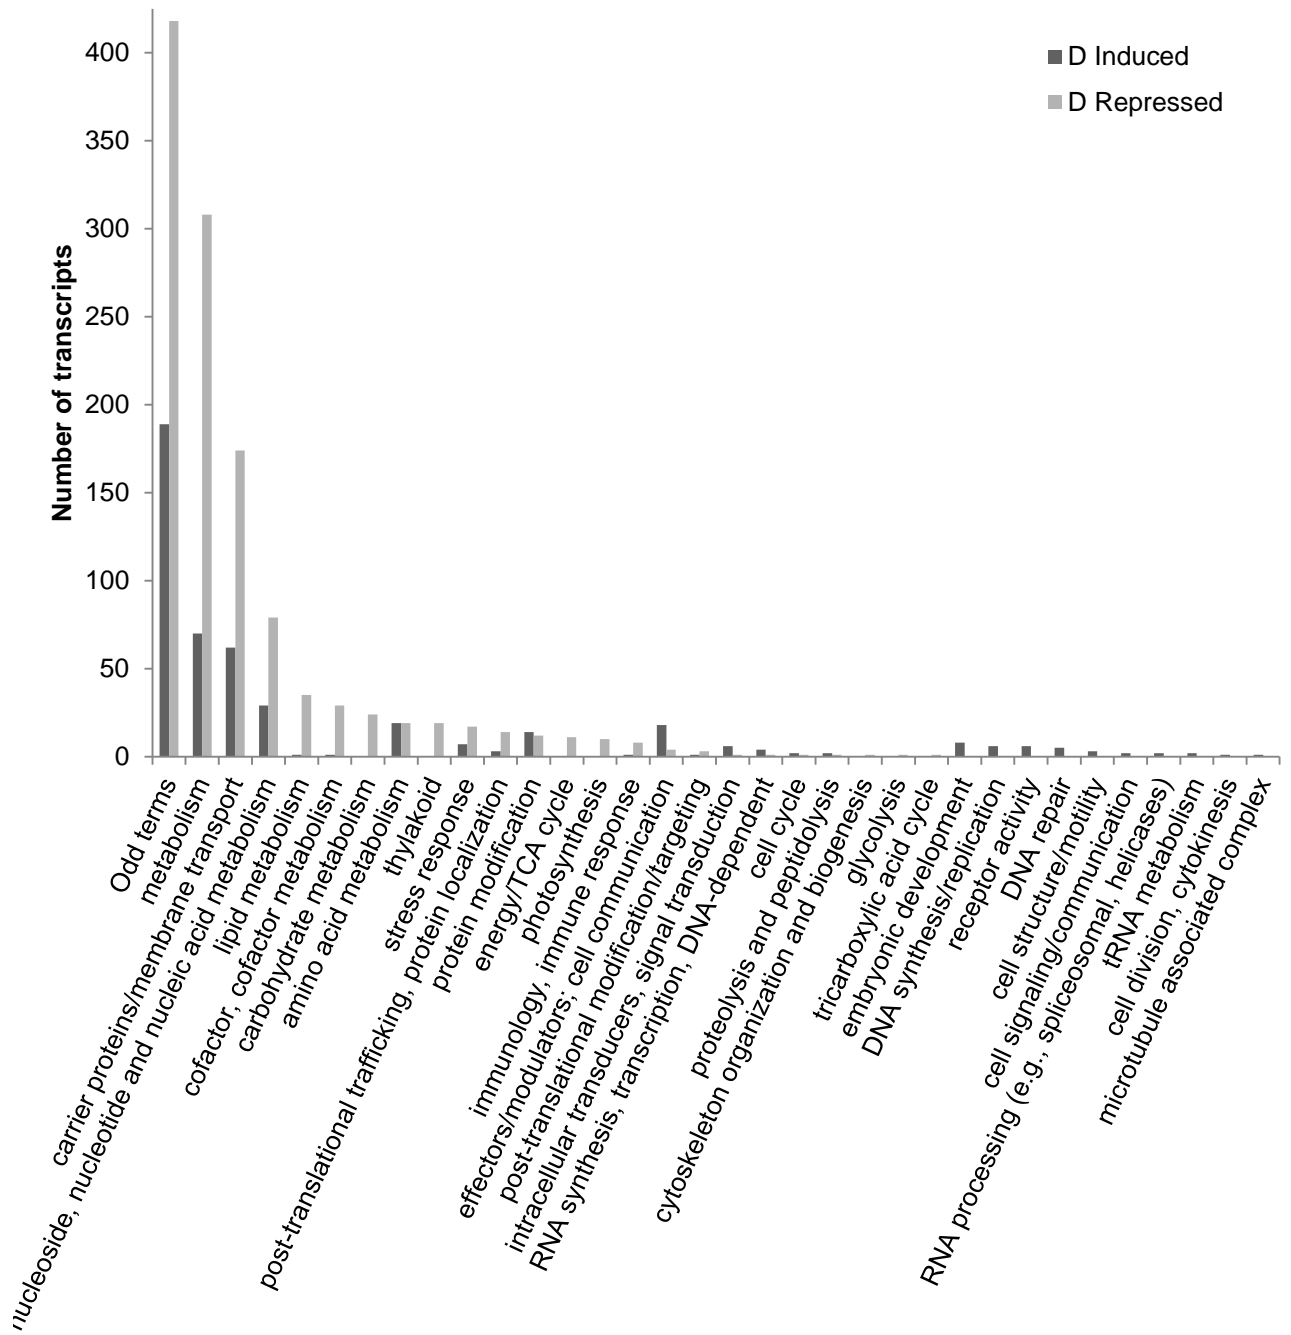

## Supplementary Figure legends

**Supplementary Figure 1.** Kyoto Encyclopedia of Genes and Genomes (KEGG)<sup>1,2,3</sup> metabolic pathway mapping of orthology (KO) and clusters of orthologous groups (COG)

**Supplementary Figure 2.** Gene ontology enrichment analysis results from induced (D Induced) and repressed (D Repressed) genes in darkness conditions. Sorting performed with CateGORizer using standard „egad“ ancestor classification categories adding GO:0015979 “photosynthesis” and GO:0009579 “thylakoid” ( $p < 0.001$ )

## References

- 1 Kanehisa, M. & Goto, S. KEGG: Kyoto Encyclopedia of Genes and Genomes. *Nucleic Acids Res* **28**, 27-30, doi:Doi 10.1093/Nar/28.1.27 (2000).
- 2 Kanehisa, M., Furumichi, M., Tanabe, M., Sato, Y. & Morishima, K. KEGG: new perspectives on genomes, pathways, diseases and drugs. *Nucleic Acids Res* **45**, D353-D361, doi:10.1093/nar/gkw1092 (2017).
- 3 Kanehisa, M., Sato, Y., Furumichi, M., Morishima, K. & Tanabe, M. New approach for understanding genome variations in KEGG. *Nucleic Acids Res* **47**, D590-D595, doi:10.1093/nar/gky962 (2019).
